# Supplementary material for: A novel multiplex qPCR targeting 23S rDNA for diagnosis of swine dysentery and porcine intestinal spirochaetosis
Source: PubMed Central journal article supplement (PMC5297149; doi:10.1186/s12917-016-0939-6), 2017-02-07
Supplement: 12917_2016_939_MOESM1_ESM.pdf [file 12917_2016_939_MOESM1_ESM.pdf]

|                          |                     |                     |                    |                             |                   |                     |                             |                     |                     |
|--------------------------|---------------------|---------------------|--------------------|-----------------------------|-------------------|---------------------|-----------------------------|---------------------|---------------------|
|                          |                     | 20                  |                    | 40                          |                   | 60                  |                             | 80                  |                     |
| <i>B. hyodesenteriae</i> | TCTGCCTAGG          | GTTAGTCGAC          | CCCTAAGATG         | AGGCTGAAAA                  | GCGTAGTCGA        | TGGGAAACAG          | GTAATATTC                   | CTGTA               | CTACTATG 80         |
| <i>B. pilosicoli</i>     | TCTGCCTAGG          | GTTAGTCGAC          | CCCTAAGATG         | AGGCTGAAAA                  | GCGTAGTCGA        | TGGGAAACAG          | GTAATATTC                   | CTGTA               | CTACTAT <b>A</b> 80 |
| <i>B. intermedia</i>     | TCTGCCTAGG          | GTTAGTCGAC          | CCCTAAGATG         | AGGCTGAAAA                  | GCGTAGTCGA        | TGGGAAACAG          | GTAATATTC                   | CTGTA               | CTACTATG 80         |
| <i>B. innocens</i>       | TCTGCCTAGG          | GTTAGTCGAC          | CCCTAAGATG         | AGGCTGAAAA                  | GCGTAGTCGA        | TGGGAAACAG          | GTAATATTC                   | CTGTA               | CTACTATG 80         |
| <i>B. murdochii</i>      | TCTGCCTAGG          | GTTAGTCGAC          | CCCTAAGATG         | AGGCTGAAAA                  | GCGTAGTCGA        | TGGGAAACAG          | GTAATATTC                   | CTGTA               | CTACTATG 80         |
|                          |                     | 100                 |                    | 120                         |                   | 140                 |                             | 160                 |                     |
| <i>B. hyodesenteriae</i> | ATATGTTTCG          | ATGGAATGAC          | ACAGATTGTT         | TA <b>T</b> GTACGCG         | TTAGATTGGT        | AGATAACGTC          | AAACAGTTTA                  | GAC <b>TTGAGGT</b>  | 160                 |
| <i>B. pilosicoli</i>     | <b>G</b> ATATGTTTCG | ATGGAATGAC          | ACAGATTGTT         | T <b>G</b> CGTACGCG         | <b>AGGTGATGGT</b> | <b>TATCCTCGTC</b>   | <b>GAA</b> TAG <b>CCG</b> A | GACTTGTG <b>G</b> T | 160                 |
| <i>B. intermedia</i>     | ATATGTTTCG          | ATGGAATGAC          | ACAGATTGTT         | T <b>G</b> CGTACGCG         | TTAGATTGGT        | AGATAACGTC          | AAACAGTTTA                  | GAC <b>TTGTGAT</b>  | 160                 |
| <i>B. innocens</i>       | ATATGTTTCG          | ATGGAATGAC          | ACAGATTGTT         | TACGTACGCG                  | TTAGATTGGT        | AGATAACGTC          | AAACAGTTTA                  | GAC <b>TTGTGAT</b>  | 160                 |
| <i>B. murdochii</i>      | ATATGTTTCG          | ATGGAATGAC          | ACAGATTGTT         | TACGTACGCG                  | TTAGATTGGT        | AGATAACGTC          | AAACAGTTTA                  | GAC <b>TTGTGAT</b>  | 160                 |
|                          |                     | 180                 |                    | 200                         |                   | 220                 |                             | 240                 |                     |
| <i>B. hyodesenteriae</i> | <b>GAGTCAAATG</b>   | <b>CTTGCTTCTT</b>   | <b>TAAGGTTAAG</b>  | <b>GCTGGATAGT</b>           | <b>GACTGGGCTT</b> | <b>TCGGGTTT</b> CAG | GAAGTTGC <b>A</b> T         | GAGCTAGGCT          | 240                 |
| <i>B. pilosicoli</i>     | GAGTAAAATG          | CTTG <b>C</b> TGCTT | TAAGGTTGAG         | <b>G</b> TGGATAGT           | GACTGGGCTT        | TCGGGTTTCAG         | GAAGTTGCGT                  | G <b>A</b> TTAGGCT  | 239                 |
| <i>B. intermedia</i>     | <b>GAGTAAAATG</b>   | <b>CTTGTTGCTT</b>   | <b>TAAGGTTGAG</b>  | <b>GCTGGATAGT</b>           | <b>GACTGGGCTT</b> | <b>TCGGGTTT</b> CAG | GAAGTTGCGT                  | GAGCTAGGCT          | 240                 |
| <i>B. innocens</i>       | <b>GAGTAAAATG</b>   | <b>CTTGTTGCTT</b>   | <b>TAAGGTTGAG</b>  | <b>GCTGGATAGT</b>           | <b>GACTGGGCTT</b> | <b>TCGGGTTT</b> CAG | GAAGTTGCGT                  | GAGCTAGGCT          | 240                 |
| <i>B. murdochii</i>      | <b>GAGTAAAATG</b>   | <b>CTTGTTGCTT</b>   | <b>TAAGGTTGAG</b>  | <b>GCTGGATAGT</b>           | <b>GACTGGGCTT</b> | <b>TCGGGTTT</b> CAG | GAAGTTGCGT                  | GAGCTAGGCT          | 240                 |
|                          |                     | 260                 |                    | 280                         |                   | 300                 |                             |                     |                     |
| <i>B. hyodesenteriae</i> | GTCGAGAAAT          | AATTTCTAAG          | GTTAGGCATG         | TCATAATCGT                  | ACCGCAAACC        | GACACAGGTG          | GGTGA                       | 305                 |                     |
| <i>B. pilosicoli</i>     | GT <b>TT</b> AGAAAT | AATT <b>C</b> TAAG  | GTTAGGCAT <b>A</b> | <b>T</b> TATAAT <b>T</b> GT | ACCGCAAACC        | GACACAGGTG          | GGTGA                       | 304                 |                     |
| <i>B. intermedia</i>     | GTCGAGAAAT          | AATTTCTAAG          | GTTAGGCATG         | <b>TC</b> <b>G</b> TAAATCGT | ACCGCAAACC        | GACACAGGTG          | GGTGA                       | 305                 |                     |
| <i>B. innocens</i>       | GTCGAGAAAT          | AATTT <b>T</b> TAAG | GTTAGGCATG         | TCATAAT <b>T</b> GT         | ACCGCAAACC        | GACACAGGTG          | GGTGA                       | 305                 |                     |
| <i>B. murdochii</i>      | GTCGAGAAAT          | AATTTCTAAG          | GTTAGGCATG         | TCATAATCGT                  | ACCGCAAACC        | GACACAG <b>T</b> TG | GGTGA                       | 305                 |                     |
