# Supplementary material for: A novel multiplex qPCR targeting 23S rDNA for diagnosis of swine dysentery and porcine intestinal spirochaetosis
Source: PubMed Central journal article supplement (PMC5297149; doi:10.1186/s12917-016-0939-6), 2017-02-07
Supplement: 12917_2016_939_MOESM2_ESM.pdf [file 12917_2016_939_MOESM2_ESM.pdf]

| <b>Organism</b>                           | <b>Source/Strain</b> |
|-------------------------------------------|----------------------|
| <i>Borrelia burgdorferi</i> B31           | ATCC 35210           |
| <i>Borrelia heimsii</i>                   | ATCC 35209           |
| <i>Klebsiella pneumoniae</i>              | clinical isolate     |
| <i>Trueperella pyogenes</i>               | DSM 20630            |
| <i>Yersinia enterocolitica</i>            | DSM 11502            |
| <i>Streptococcus equi ssp. equi</i>       | clinical isolate     |
| <i>Pasteurella multocida</i>              | clinical isolate     |
| <i>Aeromonas hydrophila</i>               | DSM 6173             |
| <i>Campylobacter coli</i>                 | DSM 4689             |
| <i>Campylobacter jejuni</i>               | DSM 4688             |
| <i>Clostridium perfringens</i> Typ A      | DSM 756              |
| <i>Pseudomonas aeruginosa</i>             | ATCC 27853           |
| <i>Staphylococcus aureus</i>              | ATCC 25923           |
| <i>Enterococcus faecalis</i>              | ATCC 29212           |
| <i>Escherichia coli</i>                   | clinical isolate     |
| <i>Staphylococcus aureus</i> , MRSA       | ATCC 43300           |
| <i>Enterococcus faecalis</i> , VRE        | ATCC 51299           |
| <i>Corynebacterium pseudotuberculosis</i> | ATCC 19410           |
| <i>Staphylococcus intermedius</i>         | DSM 20373            |
| <i>Staphylococcus pseudintermedius</i>    | DSM 21284            |
| <i>Actinobacillus pleuropneumoniae</i>    | DSM 13472            |
| <i>Haemophilus parasuis</i>               | DSM 21448            |
| <i>Rhodococcus equi</i>                   | DSM 20307            |
| <i>Streptococcus agalactiae</i>           | DSM 2134             |
| <i>Corynebacterium renale</i>             | DSM 20688            |
| <i>Bordetella bronchiseptica</i>          | clinical isolate     |
