# Supplementary material for: A novel multiplex qPCR targeting 23S rDNA for diagnosis of swine dysentery and porcine intestinal spirochaetosis
Source: PubMed Central journal article supplement (PMC5297149; doi:10.1186/s12917-016-0939-6), 2017-02-07
Supplement: 12917_2016_939_MOESM3_ESM.pdf [file 12917_2016_939_MOESM3_ESM.pdf]

Appendix Fig. A.3 One and a half column, 140mm

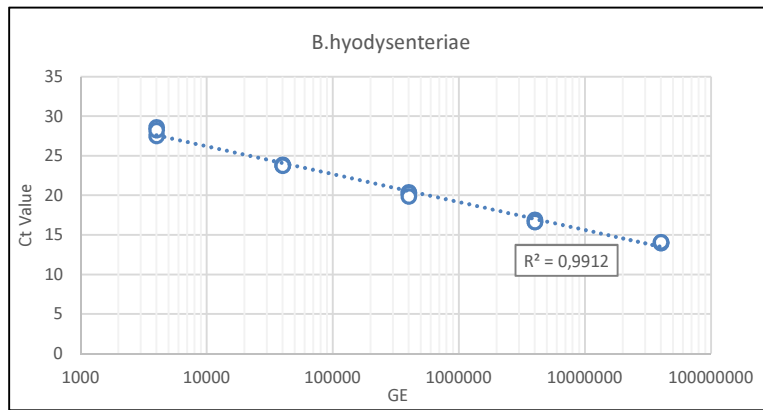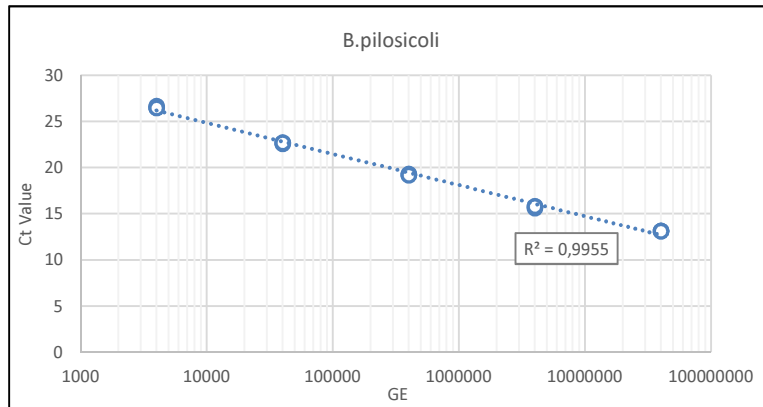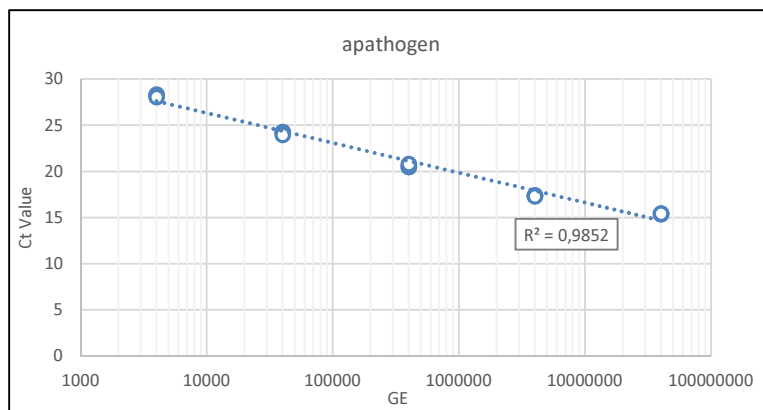

Fig. A.3 Plotting of standard curves for the three probes.
